# Supplementary material for: Microfluidic generation of aqueous two-phase-system (ATPS) droplets by oil-droplet choppers
Source: Royal Society of Chemistry journal article supplement (doi:10.1039/c7lc00696a), 2017-01-01
Supplement: c7lc00696a1.zip [file c7lc00696a1.zip]

# **Supplementary Information**

## **Microfluidic generation of aqueous two-phase-system (ATPS) droplets by oil-droplet choppers**

Chunmei Zhou<sup>1,2,‡</sup>, Pingan Zhu<sup>1,2,‡</sup>, Ye Tian<sup>1,2</sup>, Xin Tang<sup>1,2</sup>, Rui Shi<sup>1,2</sup>, Liqiu Wang<sup>1,2,\*</sup>

<sup>1</sup> *Department of Mechanical Engineering, the University of Hong Kong, Hong Kong, China*

<sup>2</sup> *HKU-Zhejiang Institute of Research and Innovation (HKU-ZIRI), 311300, Hangzhou, Zhejiang, China*

‡ These authors contributed equally to this work.

\*Corresponding author. E-mail: lqwang@hku.hk

### **Part I. Supplementary Figures**

### **Part II. Supplementary Table**

### **Part III. Supplementary Movies**

## Part I. Supplementary Figures

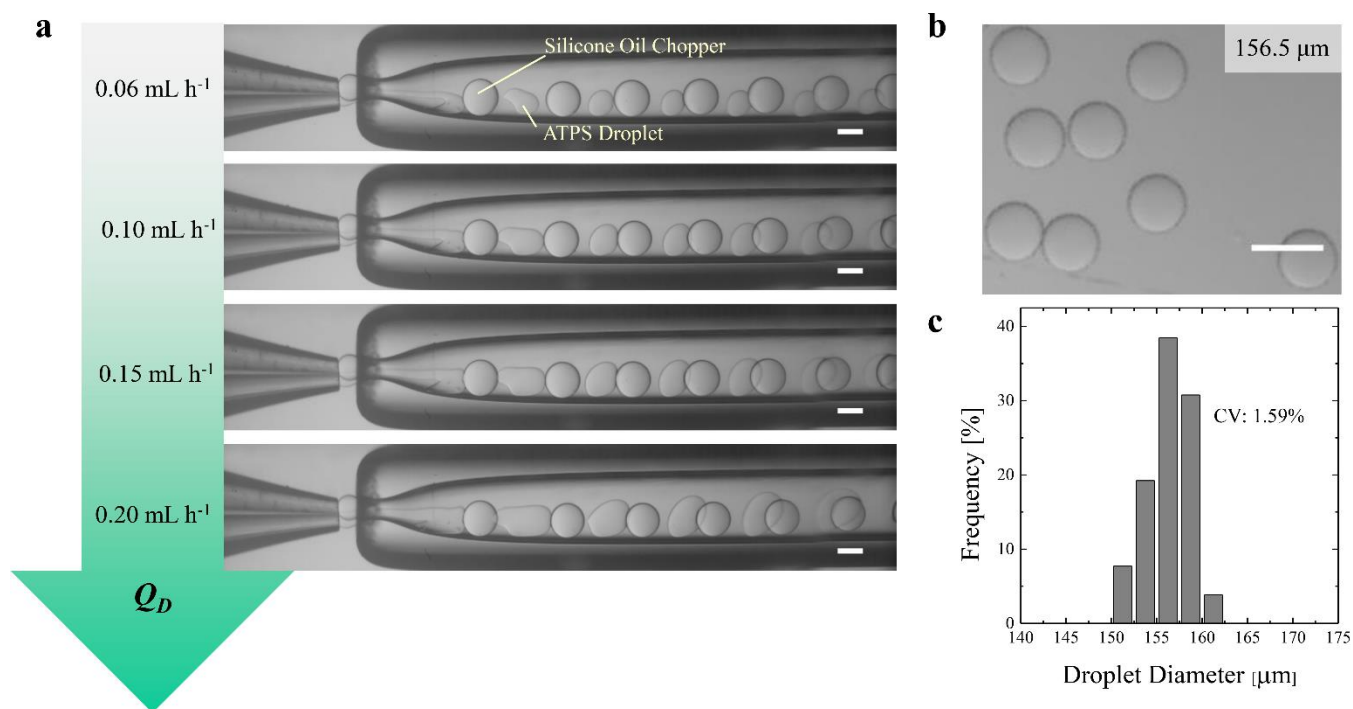

**Fig. S1** Generation of ATPS droplets by silicone oil choppers where the ATPS is produced by phase separation of 25 wt% dextran and 20 wt% PEG, with the interfacial tension of  $\gamma_{ATPS} = 0.164 \text{ mN m}^{-1}$ . (a) Micrograph of ATPS droplet generation.  $Q_o = 0.15 \text{ mL h}^{-1}$  and  $Q_P = 1.00 \text{ mL h}^{-1}$  are constant, while  $Q_D$  increases from  $0.06 \text{ mL h}^{-1}$  to  $0.20 \text{ mL h}^{-1}$  from top to bottom. As such, the frequency of ATPS droplet generation is  $\sim 3.42 \text{ Hz}$  with the increasing size from top to down. (b)-(c) ATPS droplets of the average diameter to be  $156.5 \text{ μm}$  (c) and CV to be  $1.59\%$  (d). Scale bars,  $200 \text{ μm}$ . The material properties of ATPS used in experiments are summarized in Table S1.

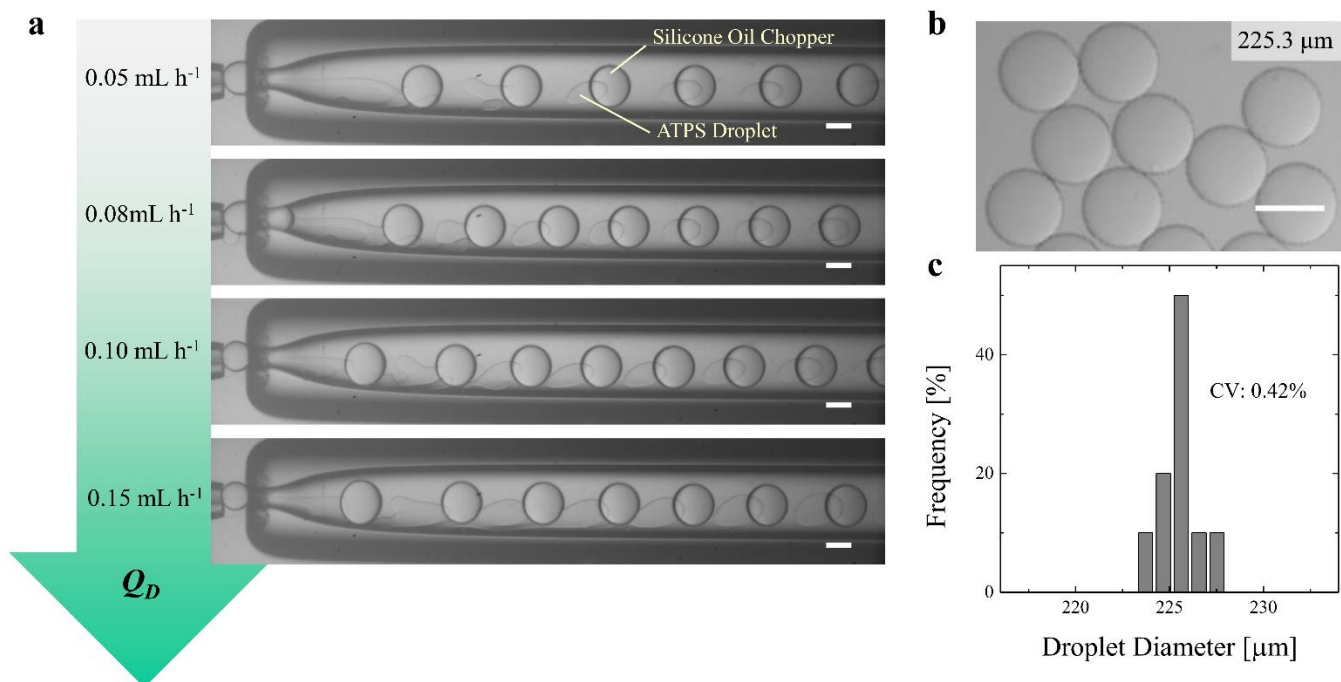

**Fig. S2** Generation of ATPS droplets by silicone oil choppers where the ATPS is produced by phase separation of 20 wt% dextran and 15 wt% PEG, with the interfacial tension of  $\gamma_{ATPS} = 0.064 \text{ mN m}^{-1}$ . (a) Micrograph of ATPS droplet generation.  $Q_o = 0.30 \text{ mL h}^{-1}$  and  $Q_P = 1.20 \text{ mL h}^{-1}$  are constant, while  $Q_D$  increases from  $0.05 \text{ mL h}^{-1}$  to  $0.15 \text{ mL h}^{-1}$  from top to bottom. As such, the frequency of ATPS droplet generation is  $\sim 4.33 \text{ Hz}$  with the increasing size from top to down. (b)-(c) ATPS droplets of the average diameter to be  $225.3 \text{ μm}$  (c) and CV to be  $0.42\%$  (d). Scale bars,  $200 \text{ μm}$ . The material properties of ATPS used in experiments are summarized in Table S1.

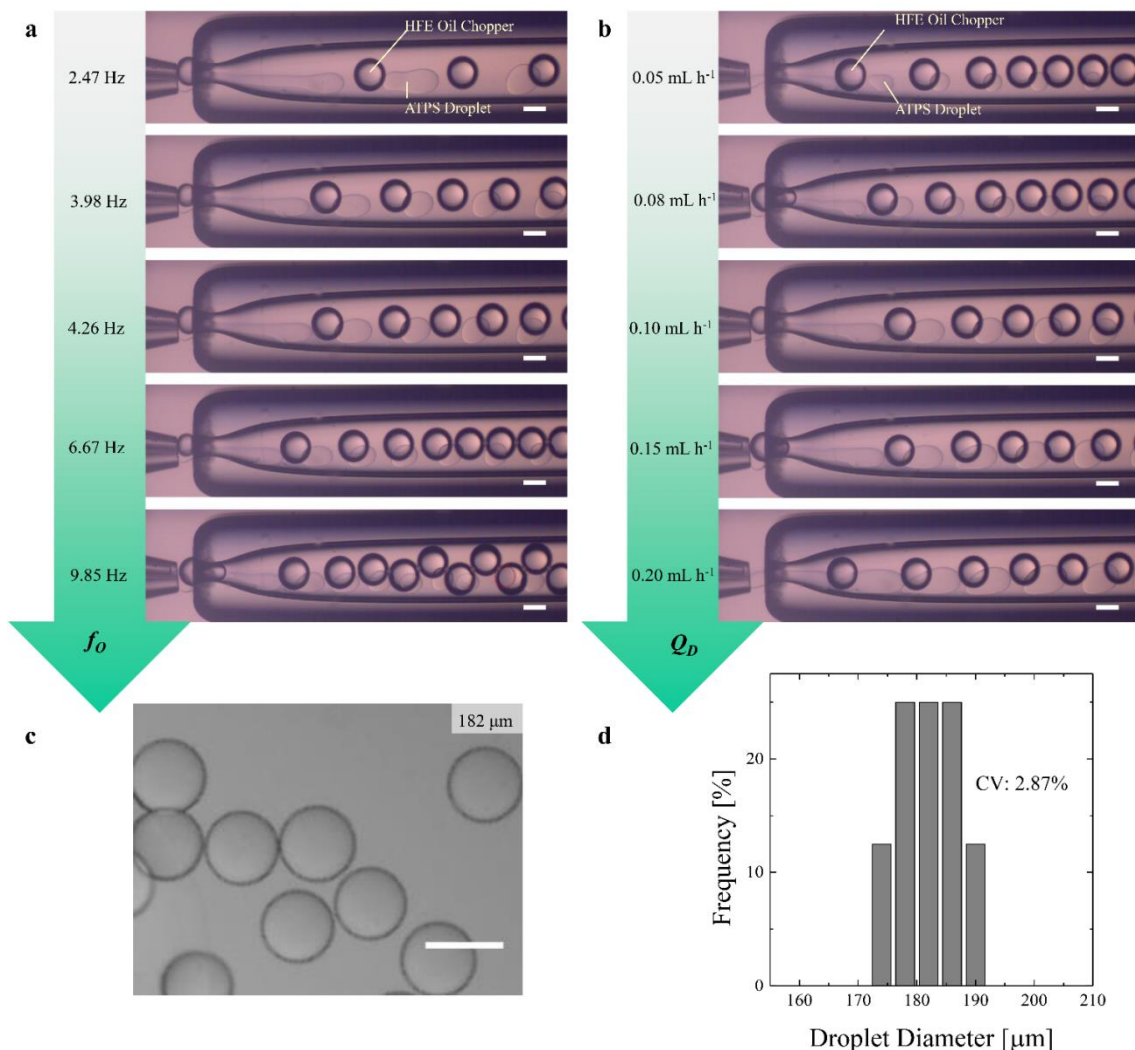

**Fig. S3** ATPS droplet generation by fluorinated oil choppers (HFE 7100, density:  $\sim 1523 \text{ kg m}^{-3}$ ). (a) Micrograph of ATPS droplet generation at 2.47 Hz, 3.98 Hz, 4.26 Hz, 6.67 Hz, and 9.85 Hz by tuning the flow rate of HFE 7100 oil phase ( $Q_o$ ) to be 0.10 mL h<sup>-1</sup>, 0.15 mL h<sup>-1</sup>, 0.20 mL h<sup>-1</sup>, 0.25 mL h<sup>-1</sup>, and 0.30 mL h<sup>-1</sup>, respectively. The flow rates of the dispersed dextran-rich phase ( $Q_D$ ) and the continuous PEG-rich phase ( $Q_P$ ) are maintained at 0.10 mL h<sup>-1</sup> and 1.00 mL h<sup>-1</sup>, respectively. (b) The size of ATPS droplets increases with  $Q_D$  (shown at the left of each micrograph) at a constant generation frequency of  $\sim 5.06 \text{ Hz}$ . The flow rates of HFE 7100 oil phase and the PEG-rich phase are constant to be 0.20 mL h<sup>-1</sup> and 1.00 mL h<sup>-1</sup>, respectively. (c)-(d) ATPS droplets of the average diameter to be 182 μm (c) and CV to be 2.87% (d). Scale bars, 200 μm.

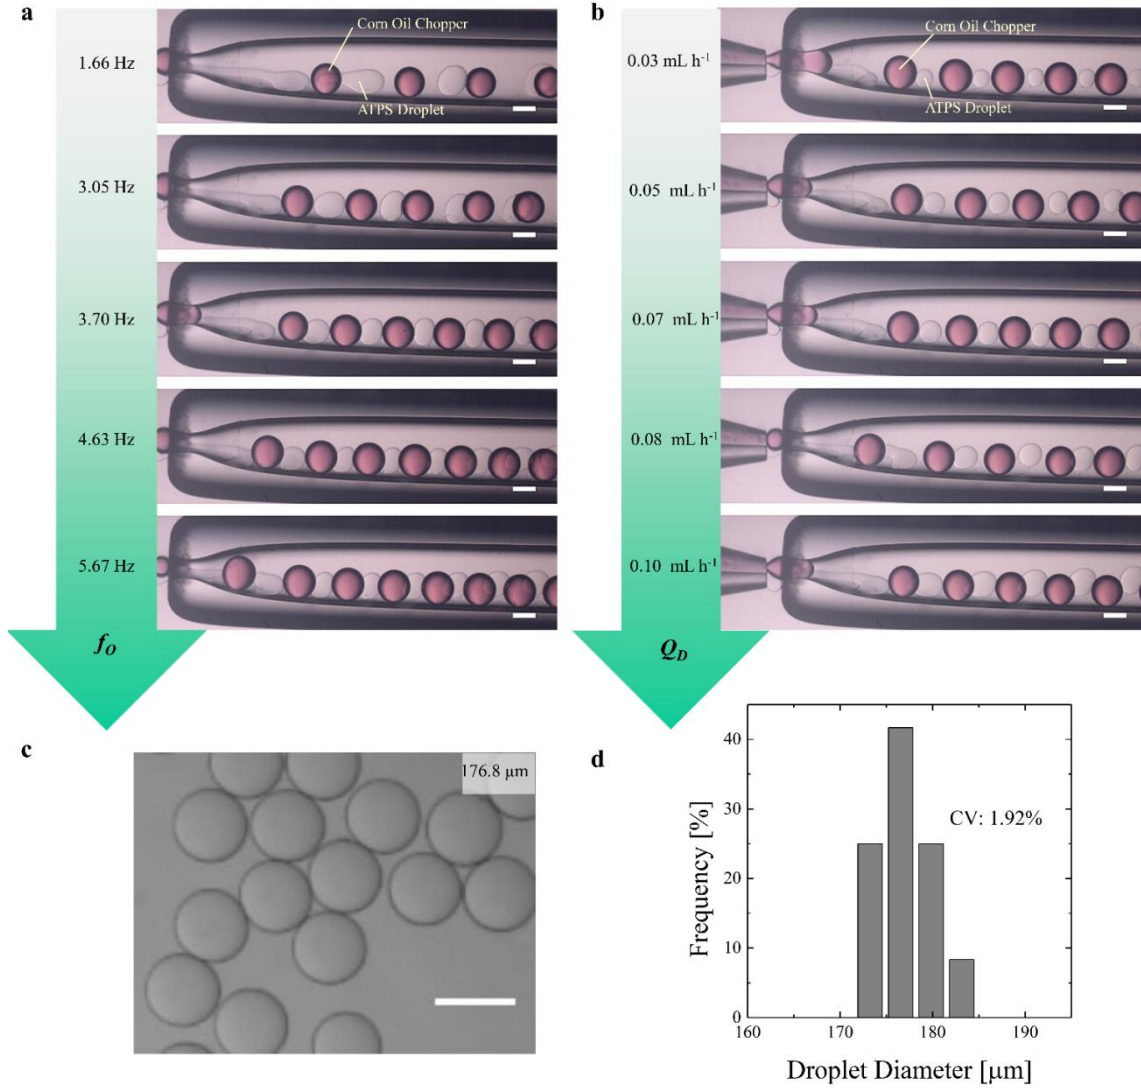

**Fig. S4** ATPS droplet generation by corn oil choppers (density:  $\sim 933.4 \text{ kg m}^{-3}$ ). (a) Micrograph of ATPS droplet generation at 1.66 Hz, 3.05 Hz, 3.70 Hz, 4.63 Hz, and 5.67 Hz by tuning the flow rate of corn oil phase ( $Q_o$ ) to be 0.08 mL h<sup>-1</sup>, 0.12 mL h<sup>-1</sup>, 0.15 mL h<sup>-1</sup>, 0.18 mL h<sup>-1</sup>, and 0.20 mL h<sup>-1</sup>, respectively. The flow rates of the dispersed dextran-rich phase ( $Q_D$ ) and the continuous PEG-rich phase ( $Q_P$ ) are maintained at 0.08 mL h<sup>-1</sup> and 0.8 mL h<sup>-1</sup>, respectively. (b) The size of ATPS droplets increases with  $Q_D$  (shown at the left of each micrograph) at a constant generation frequency of  $\sim 3.64$  Hz. The flow rates of corn oil phase and the PEG-rich phase are constant to be 0.15 mL h<sup>-1</sup> and 0.80 mL h<sup>-1</sup>, respectively. (c)-(d) ATPS droplets of the average diameter to be 176.8 μm (c) and CV to be 1.92% (d). Scale bars, 200 μm.

## Part II. Supplementary Table

Table S1 Material properties of the three different ATPS used in experiments

| Composition                    | $\rho_P^*$<br>(kg m <sup>-3</sup> ) | $\rho_D^*$<br>(kg m <sup>-3</sup> ) | $\mu_P$<br>(mPa s) | $\mu_D$<br>(mPa s) | $\gamma$<br>(mN m <sup>-1</sup> ) |
|--------------------------------|-------------------------------------|-------------------------------------|--------------------|--------------------|-----------------------------------|
| Dextran: 25 wt%<br>PEG: 15 wt% | 1062.6                              | 1138.9                              | 11.043             | 44.05              | 0.103                             |
| Dextran: 25 wt%<br>PEG: 20 wt% | 1059                                | 1155                                | 13.29              | 69.54              | 0.164                             |
| Dextran: 20 wt%<br>PEG: 15 wt% | 1057.1                              | 1130.3                              | 8.625              | 32.12              | 0.064                             |

\* Subscripts '*P*' and '*D*' denote the PEG-rich and dextran-rich phase, respectively.

## **Part III. Supplementary Movies**

### **Movie S1: Formation of a stable ATPS jet without perturbation**

The ATPS is produced by phase separation of 25 wt% dextran and 15 wt% PEG, with the interfacial tension to be  $\gamma_{ATPS} = 0.103 \text{ mN m}^{-1}$ . The flow rates of the dispersed dextran-rich phase ( $Q_D$ ) and continuous PEG-rich phase ( $Q_P$ ) are  $0.10 \text{ mL h}^{-1}$  and  $1.20 \text{ mL h}^{-1}$ , respectively. The video is recorded at 1000 frames per second (fps) and played at 200 fps.

### **Movie S2: Generation of uniform ATPS droplets by oil-choppers**

The flow rates of the dispersed dextran-rich phase ( $Q_D$ ), silicone oil chopper phase ( $Q_o$ ), and continuous PEG-rich phase ( $Q_P$ ) are  $0.10 \text{ mL h}^{-1}$ ,  $0.40 \text{ mL h}^{-1}$ , and  $1.20 \text{ mL h}^{-1}$ , respectively. The generation frequency is 4.13 Hz. The video is recorded at 1000 fps and played at 250 fps.

### **Movie S3: High frequency of uniform ATPS droplet generation**

The flow rates of the dispersed dextran-rich phase ( $Q_D$ ), silicone oil chopper phase ( $Q_o$ ), and continuous PEG-rich phase ( $Q_P$ ) are  $0.05 \text{ mL h}^{-1}$ ,  $0.50 \text{ mL h}^{-1}$ , and  $6.00 \text{ mL h}^{-1}$ , respectively. The generation frequency is  $\sim 2137 \text{ Hz}$ . The video is recorded at 5000 fps and played at 10 fps.

### **Movie S4: Top view of uniform ATPS droplets generation at the junction**

The flow rates of the dispersed dextran-rich phase ( $Q_D$ ), silicone oil chopper phase ( $Q_o$ ), and continuous PEG-rich phase ( $Q_P$ ) are  $0.10 \text{ mL h}^{-1}$ ,  $0.10 \text{ mL h}^{-1}$ , and  $2.00 \text{ mL h}^{-1}$ , respectively. The video is recorded at 1000 fps and played at 200 fps. The video is obtained in a top-view manner.

### **Movie S5: The transportation of ATPS and oil droplets in the collection capillary**

The flow rates of the dispersed dextran-rich phase ( $Q_D$ ), silicone oil chopper phase ( $Q_o$ ), and continuous PEG-rich phase ( $Q_P$ ) are  $0.10 \text{ mL h}^{-1}$ ,  $0.10 \text{ mL h}^{-1}$ , and  $2.00 \text{ mL h}^{-1}$ , respectively. The video is recorded at 1000 fps and played at 200 fps. The video is obtained in a side-view manner.

### **Movie S6: The separation of ATPS and oil droplets**

The flow rates of the dispersed dextran-rich phase ( $Q_D$ ), silicone oil chopper phase ( $Q_o$ ), and continuous PEG-rich phase ( $Q_P$ ) are  $0.10 \text{ mL h}^{-1}$ ,  $0.10 \text{ mL h}^{-1}$ , and  $2.00 \text{ mL h}^{-1}$ , respectively. The video is recorded at 1000 fps and played at 200 fps. The video is obtained in a side-view manner.
